# Supplementary material for: Loss of plasmacytoid dendritic cell differentiation is highly predictive for post-induction measurable residual disease and inferior outcomes in acute myeloid leukemia
Source: PubMed Central journal article supplement — Haematologica. 2018 Dec 6;104(7):1378–87. doi: 10.3324/haematol.2018.203018 (PMC6601104; doi:10.3324/haematol.2018.203018), 2019-07
Supplement: 2018_203018-Disclosures_and_Contributions.pdf [file 2018_203018-Disclosures_and_Contributions.pdf]

Haematologica  
HAEMATOL/2018/203018  
Version 3

Loss of plasmacytoid dendritic cell differentiation is highly predictive for post-induction measurable residual disease and inferior outcomes in acute myeloid leukemia

Wenbin Xiao, Aaron D. Goldberg, Christopher Famulare, Sean Devlin, Nghia Nguyen, Sinnifer Sim, Charlene C. Kabel, Mina A. Patel, Erin McGovern, Akshar Patel, Jessica Schulman, Andrew Dunbar, Zachary D. Epstein-Peterson, Kamal Menghrajani, Bartlomiej M. Getta, Sheng F. Cai, Mark B. Geyer, Jacob Glass, Justin Taylor, Aaron D. Viny, Ross L. Levine, Yanming Zhang, Sergio Giralto, Virginia Klimek, Martin S. Tallman, and Mikhail Roshal

Disclosures: S.F.C. has consulted for Imago Biosciences. M.B.G has received honorarium from Dava Oncology. A.D.V. received travel support from Mission Bio and is on the Editorial Advisory Board of Hematology News. R.L.L. is on the supervisory board of Qiagen and is a scientific advisor to Loxo, Imago, C4 Therapeutics and Isoplexis. He receives research support from and consulted for Celgene and Roche, research support from Prelude Therapeutics, and has consulted for Novartis and Gilead. He has received honoraria from Lilly and Amgen for invited lectures. MST receives research support from Arog, Cellerant, ADC therapeutics, Orsenix and Biosight. He is on the following advisory boards: Daiichi-Sankyo, Roche, Abbvie. M.R. has consulted for Agios, BD Biosciences and Celgene, and has received contract research funding from Agios, Bayer, BMS and Roche.

Contributions: Contributions: W.X., and M.R. conceived the study, collected and analyzed the data. W.X., A.D.G., and M.R. wrote the paper. A.D.G., C.F., C.K., M.A.P., E.M., A.P., J.S., A.D., Z. D.E., K.M., B.M.G., S.F.C., M.B.G., J.G., J.T., A.D.V., R.L.L., Y.Z., S.G., V.K., and M.S.T. provided critical clinical information. S.D. performed statistical analysis. N.N. and S.S. helped flow cytometric studies. All authors approved the final version of the manuscript.
